# Supplementary material for: The Influence of Plant Stress Hormones and Biotic Elicitors on Cyclotide Production in Viola uliginosa Cell Suspension Cultures
Source: MDPI journal article supplement (doi:10.3390/plants11141876), 2022-07-19

**Figure S1.** MSMS de novo sequencing of the peptide fragment resulting from trypsin cleavage of alkylated viul M cyclotide

Observed MW: 2671.1421

Predicted sequences:

| Sequence                  | Calculated MW | Delta |
|---------------------------|---------------|-------|
| DGIPCGESC VFIPCLTAAIGCSCK | 2671.1575     | 0.02  |

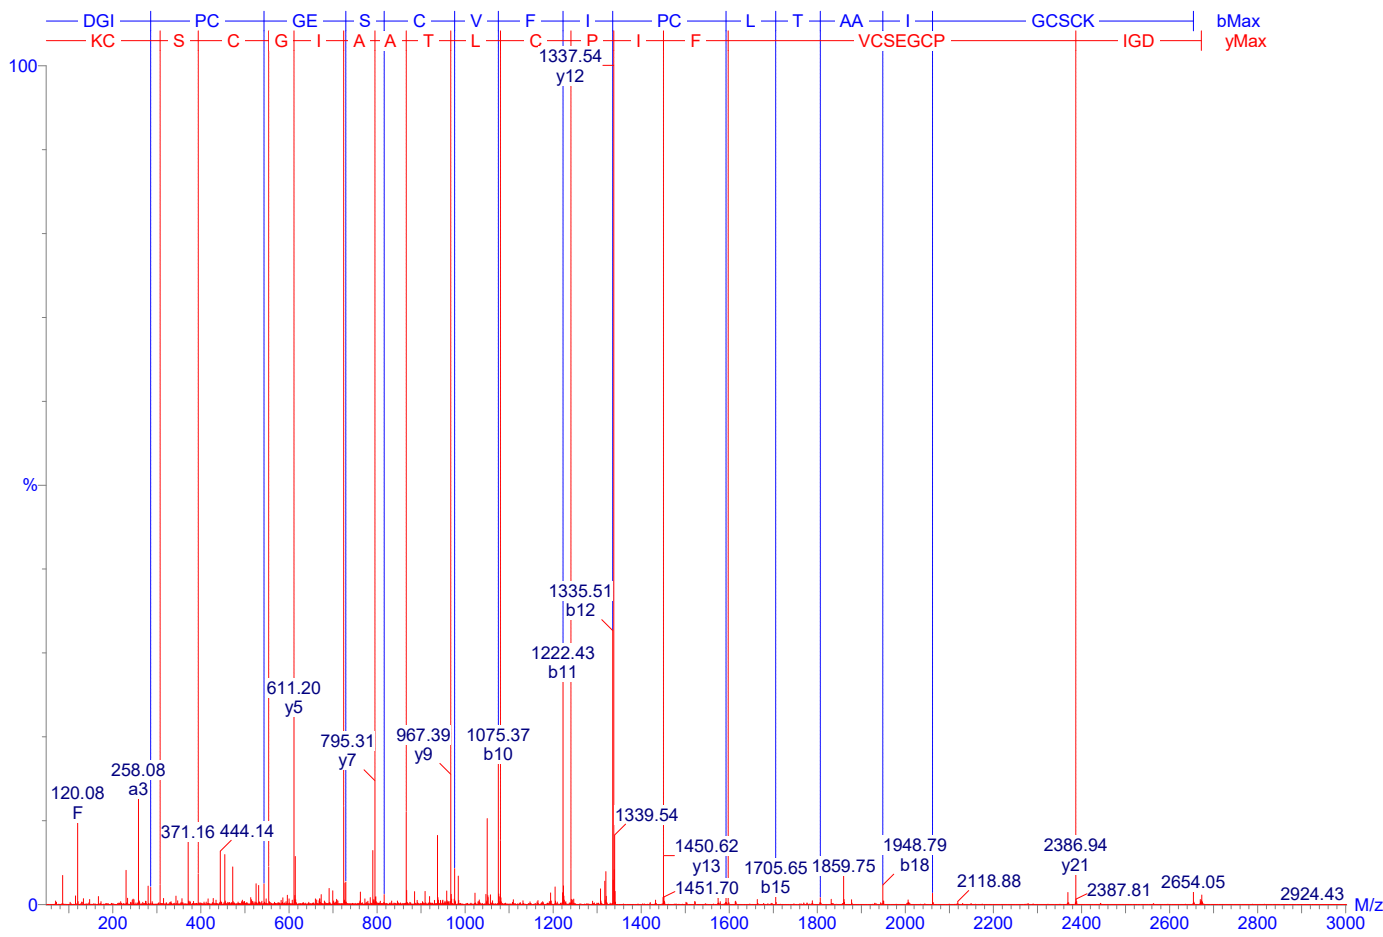

Supplement: s1 [file s1]
